# Supplementary material for: Bubble-blowing-inspired sub-micron thick freestanding silk films for programmable electronics
Source: Royal Society of Chemistry journal article supplement (doi:10.1039/d2nr05490f), 2023-01-01
Supplement: d2nr05490f1.pdf [file d2nr05490f1.pdf]

## Bubble-blowing-inspired sub-micron freestanding silk film for programmable electronics

Qingsong Li,<sup>\*a</sup> Fengjiao Bai,<sup>b</sup> Jing Sun,<sup>a</sup> Xiaomeng Zhou,<sup>a</sup> Wei Yuan,<sup>c</sup> Jin Lin,<sup>a</sup> Ke-Qin Zhang,<sup>\*b</sup>  
Guanglin Li<sup>a</sup> and Zhiyuan Liu<sup>\*a</sup>

<sup>a</sup>CAS Key Laboratory of Human-Machine Intelligence-Synergy Systems, Shenzhen Institutes of Advanced Technology, Chinese Academy of Sciences (CAS), Shenzhen 518055, China. E-mail: qs.li@siat.ac.cn; zy.liu1@siat.ac.cn

<sup>b</sup>National Engineering Laboratory for Modern Silk, College of Textile and Clothing Engineering, Soochow University, Suzhou 215123, China. E-mail: kqzhang@suda.edu.cn

<sup>c</sup>Printable Electronics Research Centre, Suzhou Institute of Nano-Tech and Nano-Bionics, Chinese Academy of Sciences, Suzhou, 215123, China

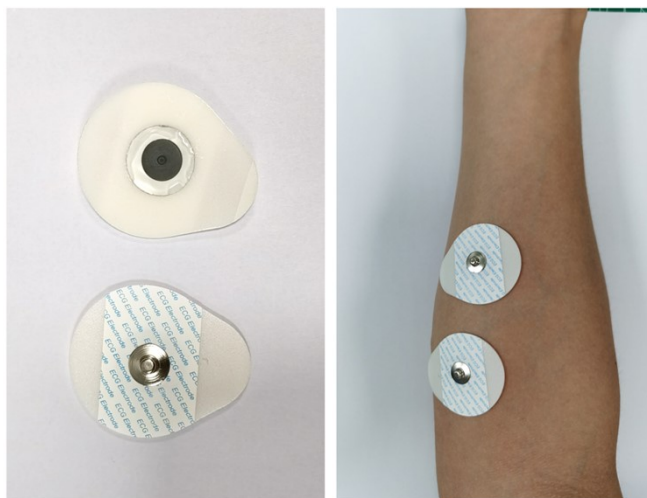

Fig. S1 photos of the commercial electrodes and their placement on the arm of a volunteer.

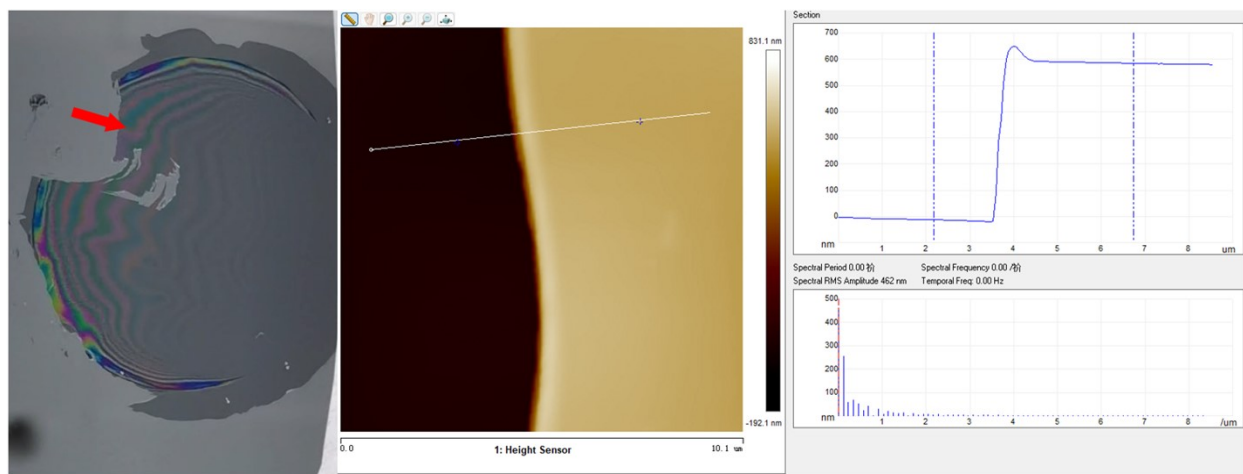

Fig. S2 Photo and AFM profile showing the thickness of the ultrathin silk film.

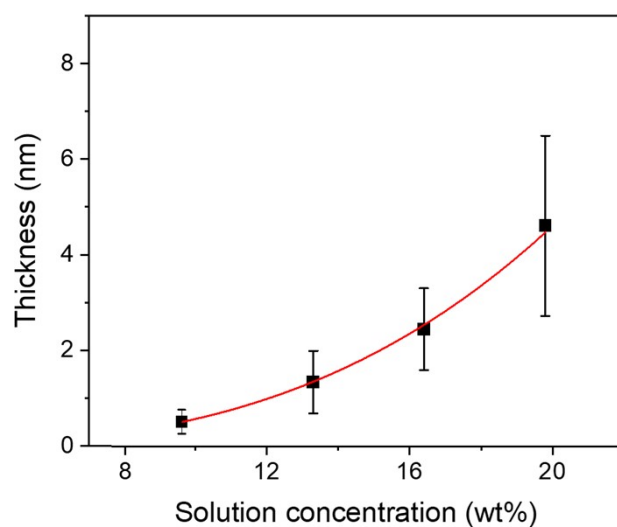

Fig S3 The thicknesses of the silk films prepared using silk fibroin solutions with different concentrations.

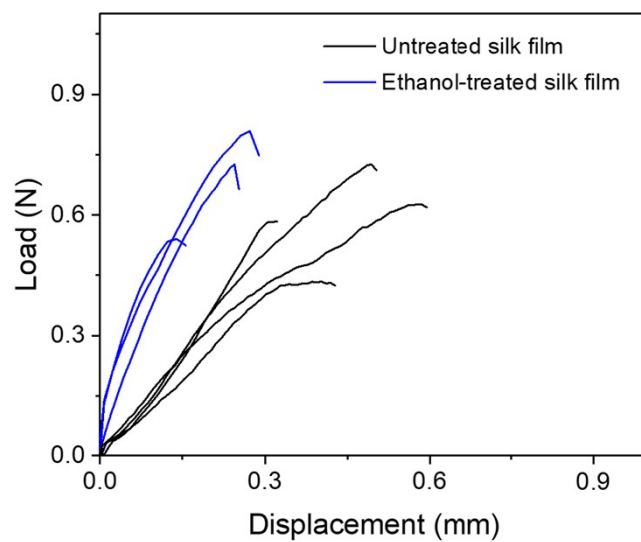

Fig. S4 Mechanical properties of the untreated and ethanol-treated silk films.

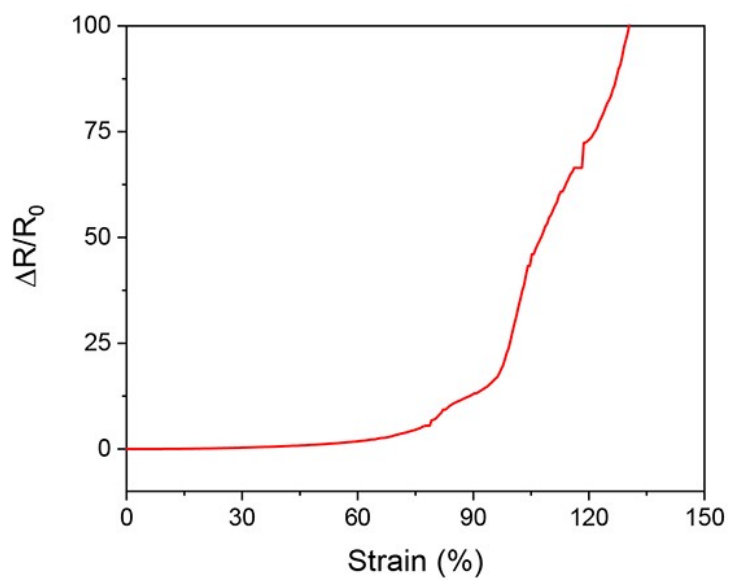

Fig. S5 Resistance change of the silk film electrode under strain.

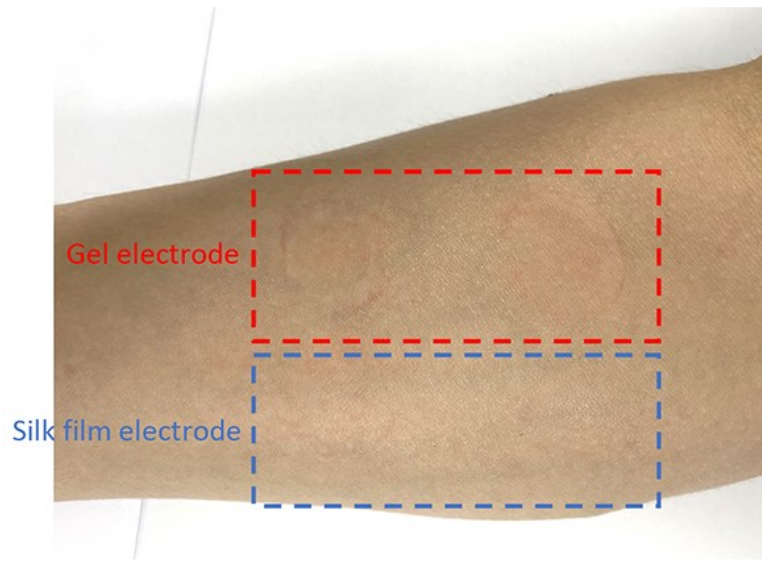

Fig. S6 Photo of the skin after wearing silk film electrodes and commercial gel electrodes for 12h.
